# Supplementary material
Source: publisher site journal article supplement (https://www.dovepress.com/article/457414)
Supplement: Supplementary file 1 [file get_supplementary_file.php]

**Supplementary Materials**

**Supplementary Figures:**


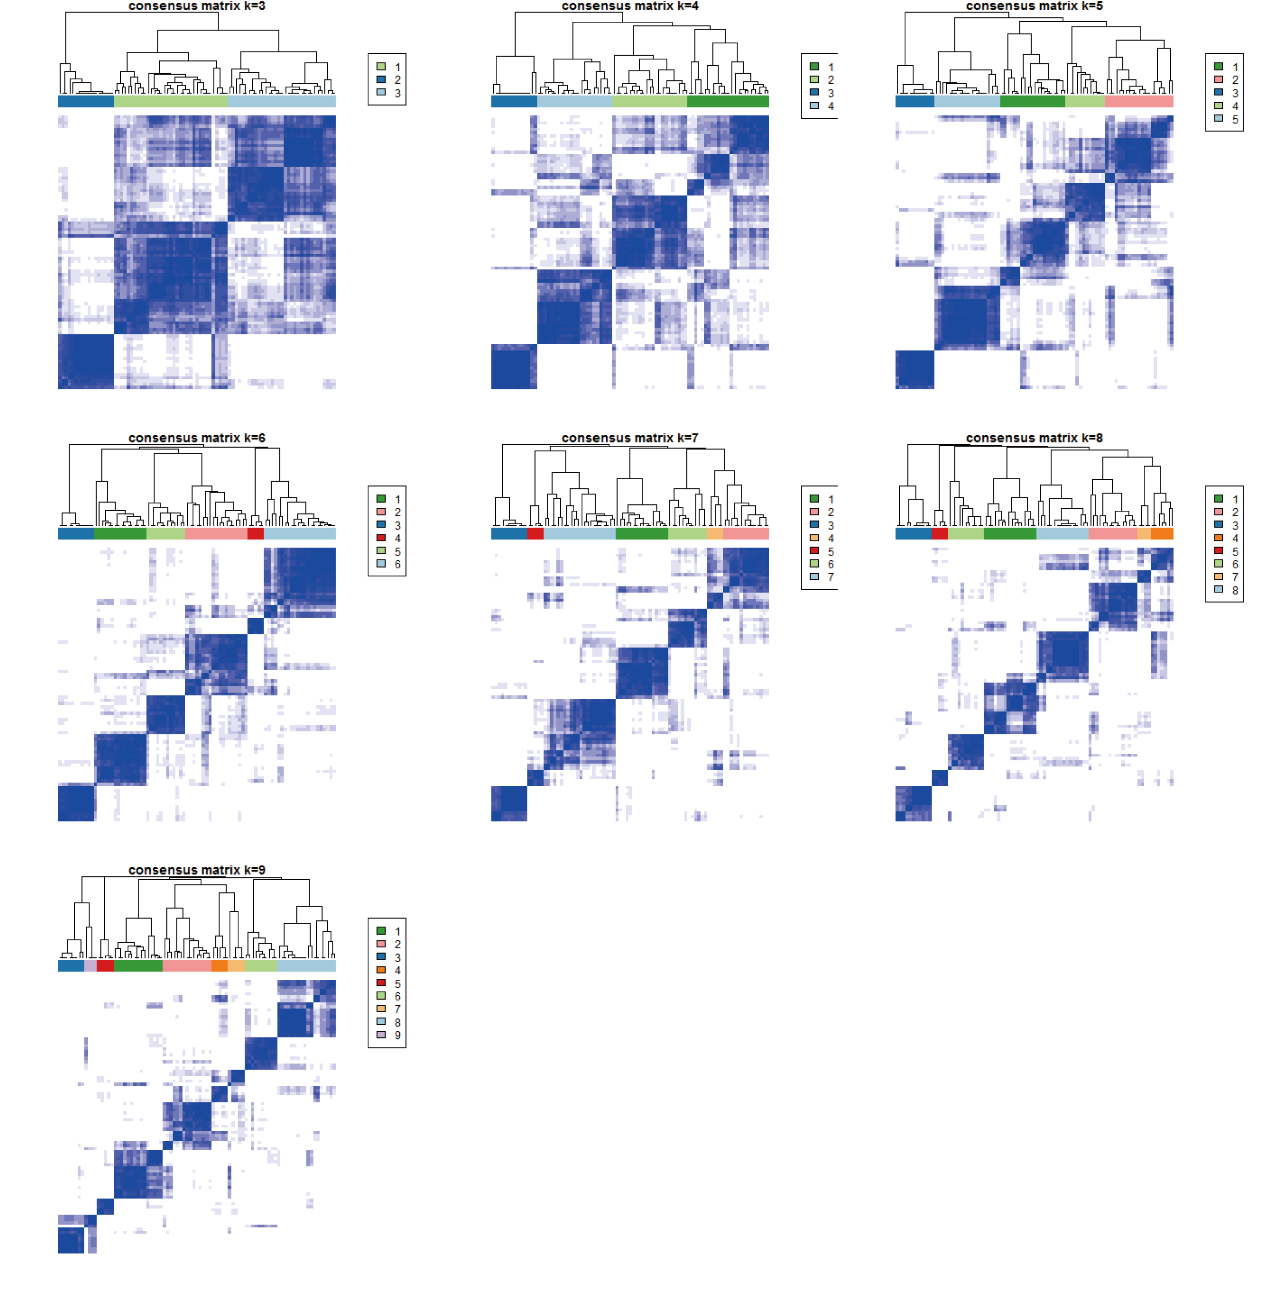
**Supplementary Figure S1**. Clustering heatmap of different clusters (k = 3-9) based on M2R-CRGs.

**Supplementary Tables:**

| **Supplementary Table S1.** 19 cuproptosis-related genes. |
| --- |
| Cuproptosis-related genes |
| NFE2L2  NLRP3  ATP7B  ATP7A  SLC31A1  FDX1  LIAS  LIPT1  LIPT2  DLD  DLAT  PDHA1  PDHB  MTF1  GLS  CDKN2A  DBT  GCSH  DLST |

| **Supplementary Table S2.** Identification of differentially expressed (DE)-CRGs. |
| --- |
| DE-CRGs |
| SLC31A1  DLD  MTF1  GLS  DBT |
